# Supplementary material for: Size-dependent selectivity of iron-based electrocatalysts for electrochemical CO2 reduction
Source: Royal Society of Chemistry journal article supplement (doi:10.1039/d1se01726h), 2021-12-13
Supplement: d1se01726h1.pdf [file d1se01726h1.pdf]

# Supporting Information

## Size-Dependent Selectivity of Iron-Based Electrocatalysts for electrochemical CO<sub>2</sub> reduction

**Mengna Xie<sup>a</sup>, Na Gao<sup>b,d</sup>, GuoPing Xiao<sup>b,c,d</sup>, Min Ge<sup>b,c,d</sup>, Xian-Long Du\*<sup>b,c,d</sup>,  
BingBao Mei<sup>b,c,e</sup>, Jian-Qiang Wang<sup>b,c,d</sup> and Tao Li\*<sup>a</sup>**

<sup>a</sup> Engineering Research Center of Large-Scale Reactor Engineering and Technology,  
Ministry of Education, State Key Laboratory of Chemical Engineering, East China  
University of Science and Technology, Shanghai 200237, China

<sup>b</sup> Key Laboratory of Interfacial Physics and Technology, Shanghai Institute of  
Applied Physics, Chinese Academy of Sciences, Shanghai 201800

<sup>c</sup> University of Chinese Academy of Sciences, Beijing 100049, China

<sup>d</sup> Dalian National Laboratory for Clean Energy, Chinese Academy of Sciences, Dalian  
116023, China

<sup>e</sup> Shanghai Synchrotron Radiation Facility, Zhangjiang National Lab, Chinese  
Academy of Sciences, 201204 Shanghai, China

\* Corresponding Author

E-mail: [tli@ecust.edu.cn](mailto:tli@ecust.edu.cn) ; [duxianlong@sinap.ac.cn](mailto:duxianlong@sinap.ac.cn)

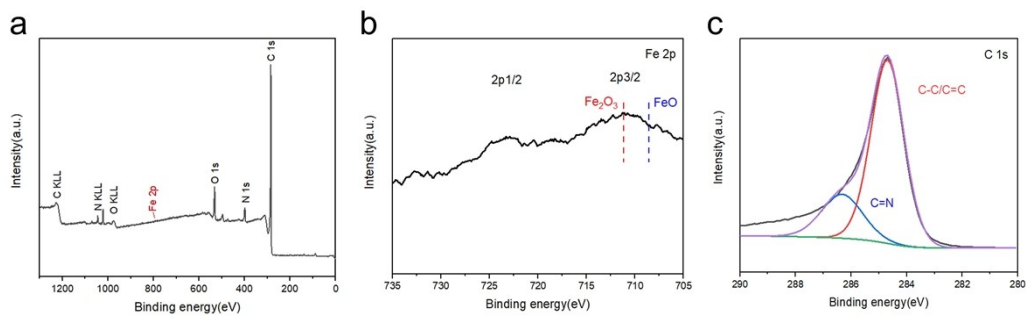

**Figure S1.** XPS spectra of Fe SAs catalyst. (a) Survey spectra (b) Fe 2p. The red and blue vertical lines indicate the binding energy of Fe 2p<sup>3/2</sup> of Fe<sub>2</sub>O<sub>3</sub> and FeO, respectively (c) C 1s

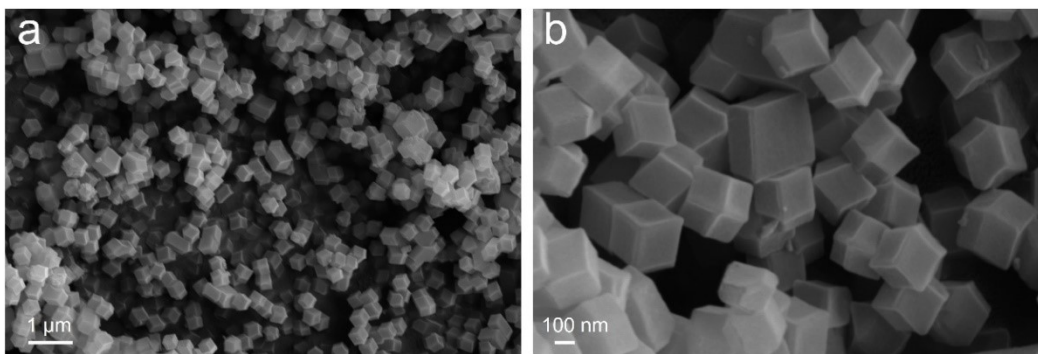

**Figure S2.** (a) and (b) SEM images of ZIF-8. It is obvious that the synthesized ZIF-8 exhibits a uniform rhombododecahedral shape.

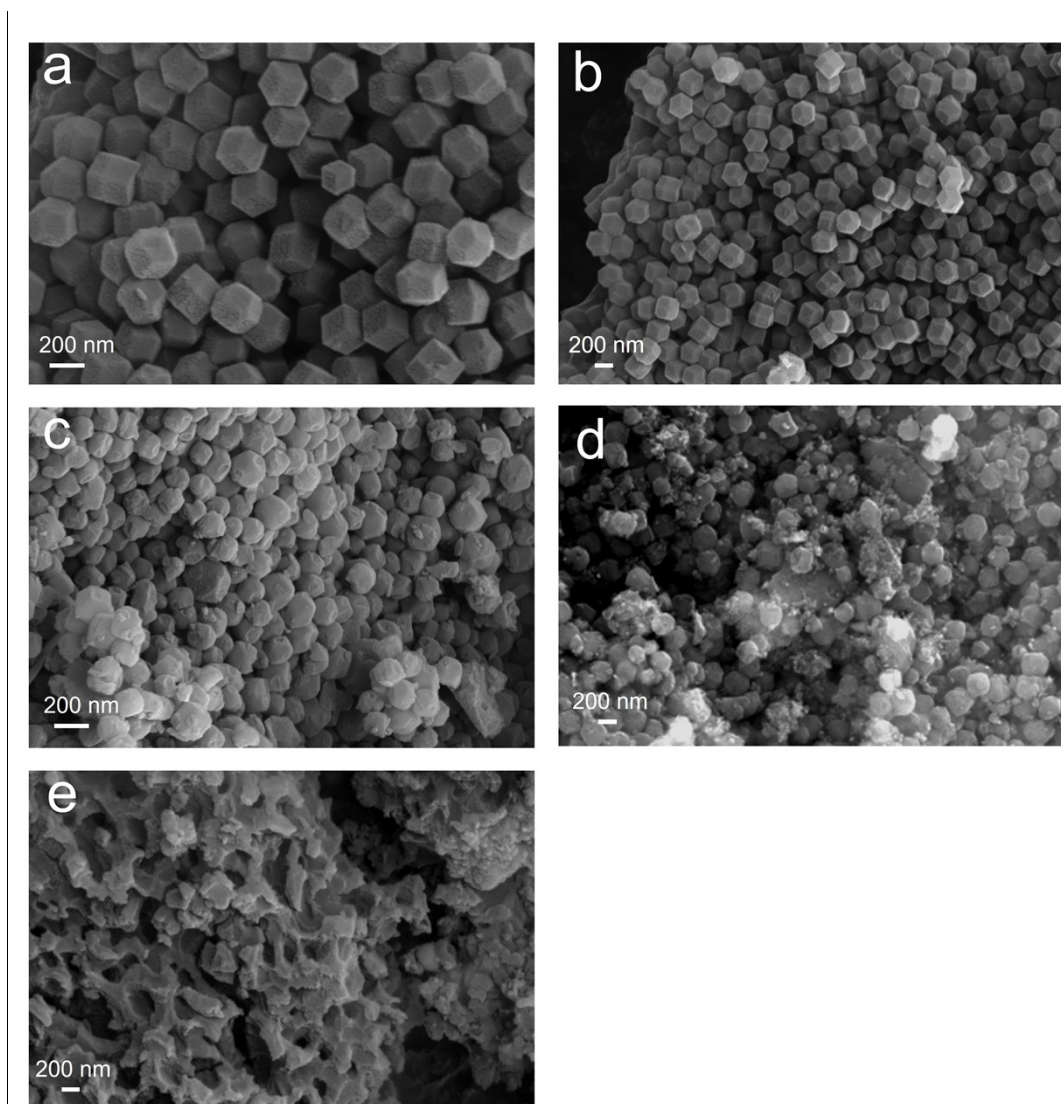

**Figure S3.** SEM characterization of Fe-N-C. (a) - (e) SEM images of Fe SAs, 7.6 Fe NPs, 16.7 Fe NPs, 44.8 Fe NPs and oversized Fe NPs, which were synthesized by adding 25  $\mu\text{L}$ , 100  $\mu\text{L}$ , 400  $\mu\text{L}$ , 700  $\mu\text{L}$  and 5mL  $\text{Fe}(\text{NO}_3)_3$  solution ( $100 \text{ mg mL}^{-1}$ ).

As  $\text{Fe}(\text{NO}_3)_3$  dosage volume increases, the initial rhombic dodecahedron structure collapse gradually and evolves into a porous structure after calcining at  $1000^\circ\text{C}$  for 2h.

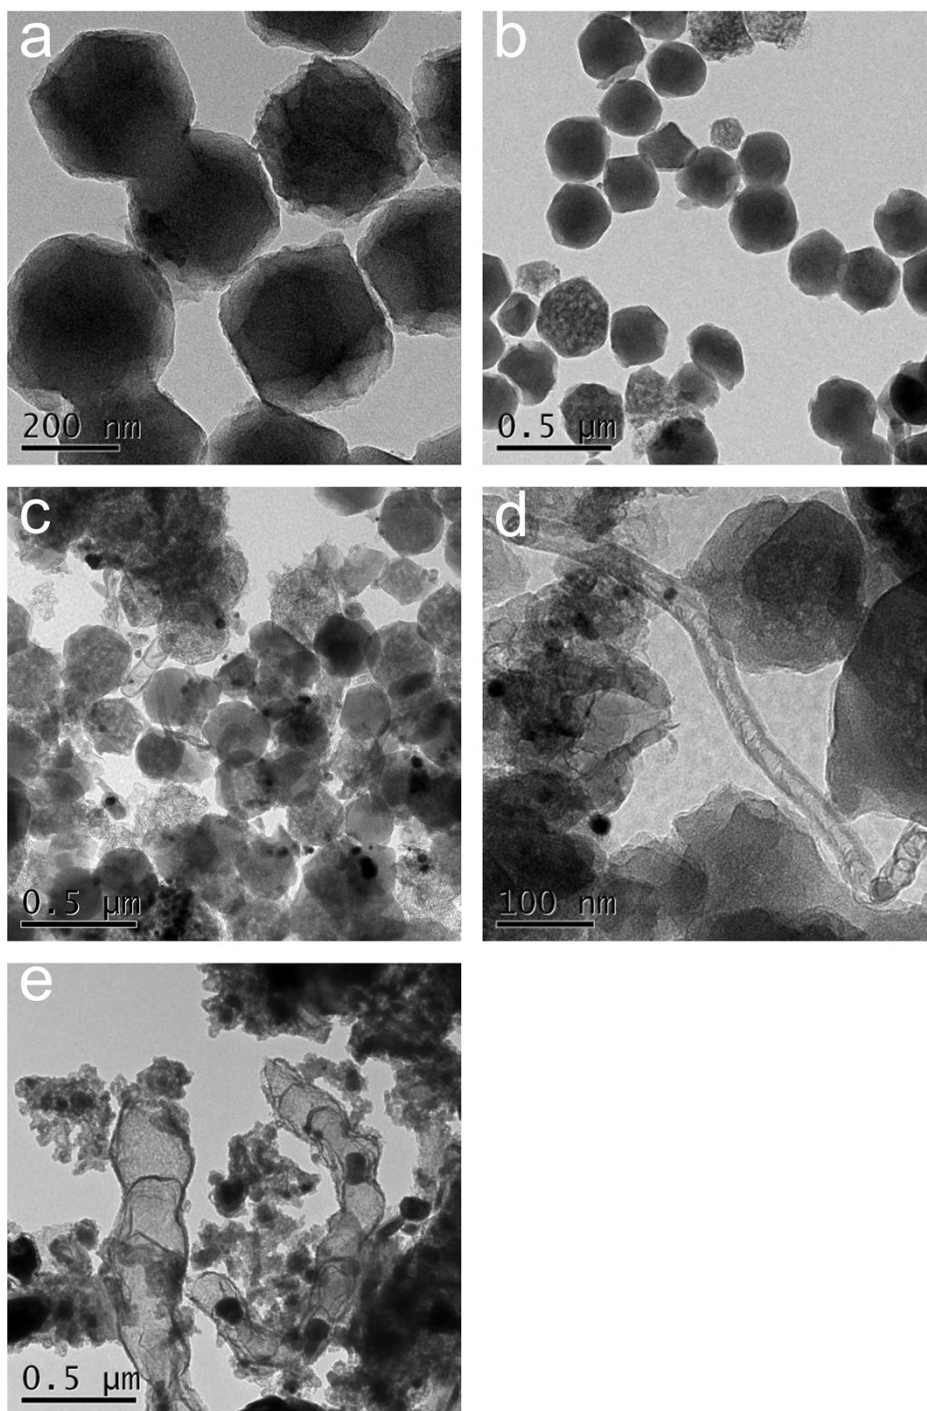

**Figure S4.** TEM characterization of Fe-N-C. (a) - (e) the representative TEM images of Fe SAs, 7.6 Fe NPs, 16.7 Fe NPs, 44.8 Fe NPs and oversized Fe NPs.

As seen in Figure S3, when increasing the volume of  $\text{Fe}(\text{NO}_3)_3$  solution, carbon nanotubes (CNTs) are formed. The diameter of CNTs is further enlarged from 20-40 nm to 210-300 nm with the specific volume of  $\text{Fe}(\text{NO}_3)_3$  increasing from 400  $\mu\text{L}$  to 5mL, correspondingly.

Generally speaking, metal nanoparticles are commonly utilized as nucleation sites of CNTs, thus the CNTs formed in this experiment may be caused by the nucleation effect of Fe NPs, which comes from the aggregation of Fe SAs.

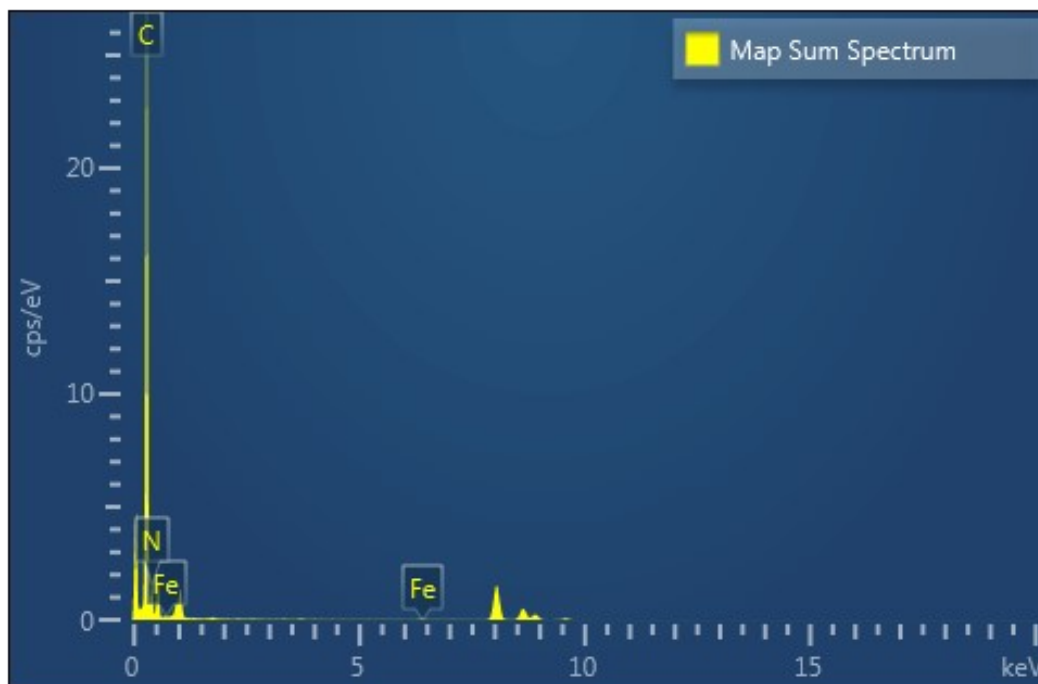

**Figure S5.** Energy dispersive spectroscopy (EDS) characterization of Fe SAs. No visible Zn signal locating at 8.63 keV was detected in Fe SAs, suggesting low residual Zn content.

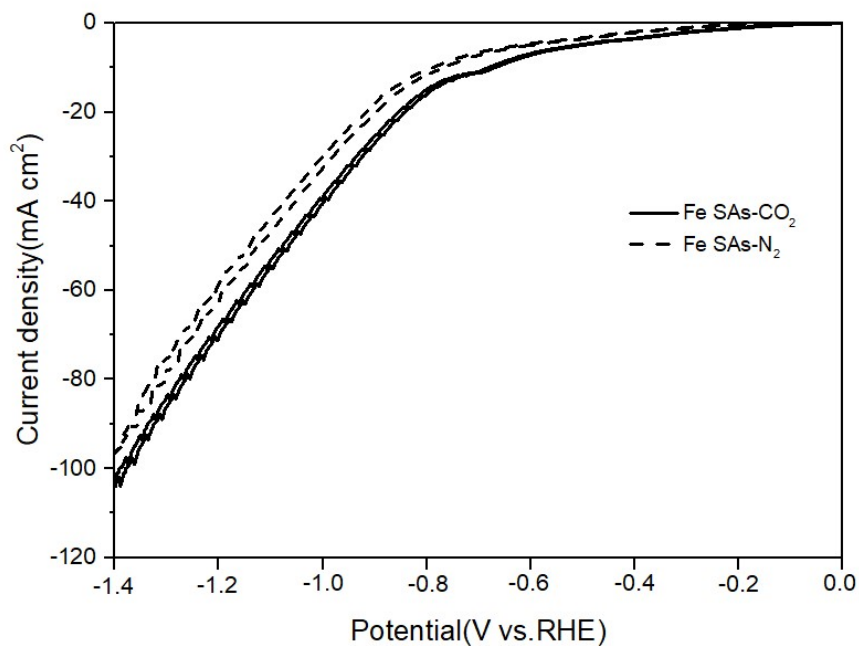

**Figure S6.** CV curves of Fe SAs, measured in N<sub>2</sub>-saturated (dotted line) or CO<sub>2</sub>-saturated (solid line) 0.5M KHCO<sub>3</sub> within a three-electrode configuration with Pt as the counter electrode and Ag/AgCl as the reference electrode. The test is carried out in a flow cell with a scanning rate of 10 mV s<sup>-1</sup>

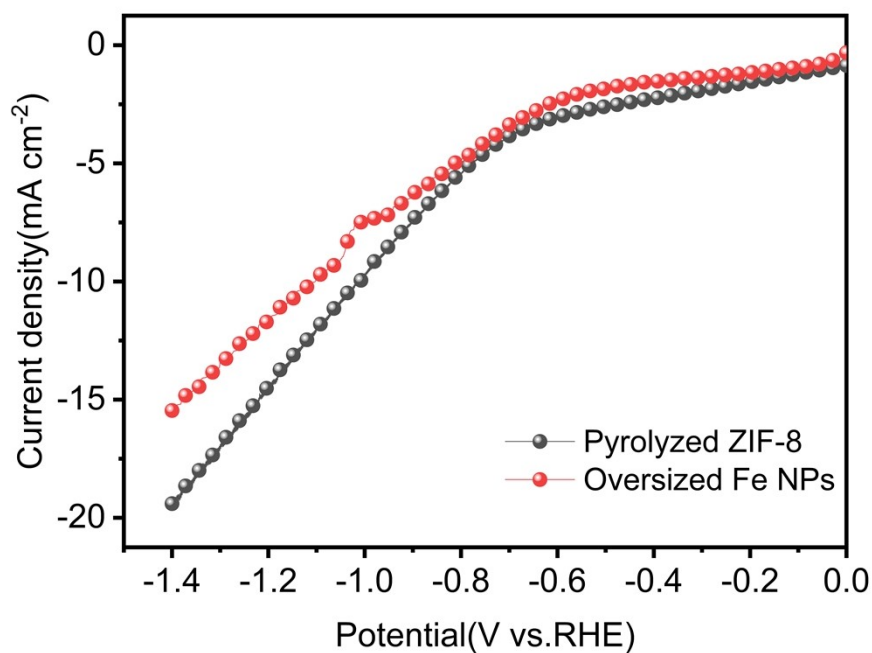

**Figure S7.** LSV curves of pyrolyzed ZIF-8 and oversized Fe NPs with a scanning rate of 10 mV s<sup>-1</sup>

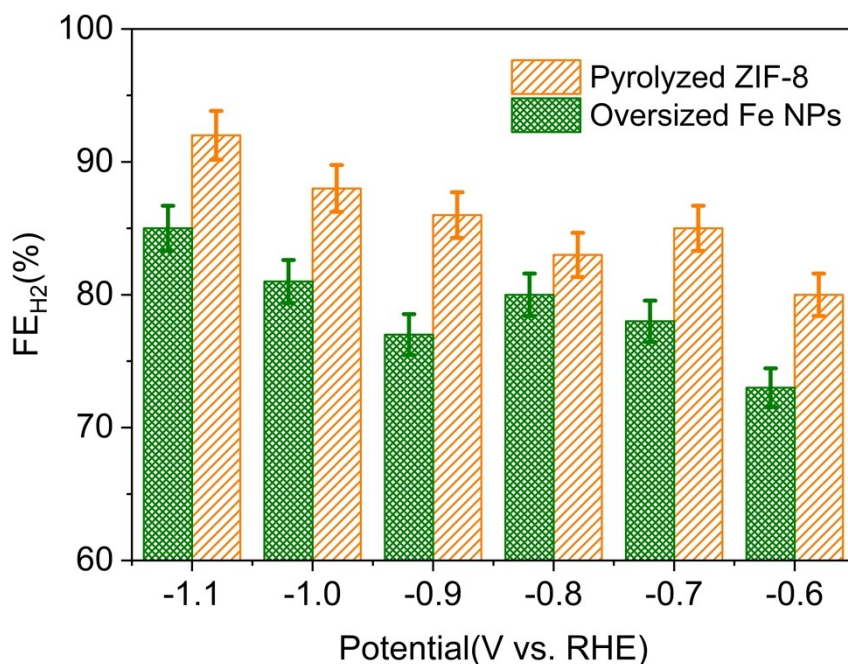

**Figure S8.** FE for H<sub>2</sub> production of pyrolyzed ZIF-8 and oversized NPs with diameters exceeding 100 nm measured in CO<sub>2</sub>-saturated 0.5 M KHCO<sub>3</sub>. For comparison, N-doped carbon substrate prepared by pyrolysis of ZIF-8 powder without injecting Fe(NO<sub>3</sub>)<sub>3</sub> solution shows no apparent activity of CO<sub>2</sub>RR, whose FE<sub>H<sub>2</sub></sub> is over 80% at all applied potentials, further confirming that the decisive role of isolated iron atoms rather than the N-doped carbon structure in CO<sub>2</sub>RR performance. The FE for H<sub>2</sub> production of oversized Fe NPs is also observed to be ~75%, indicating CO<sub>2</sub>RR is inhibited while enhancing HER.

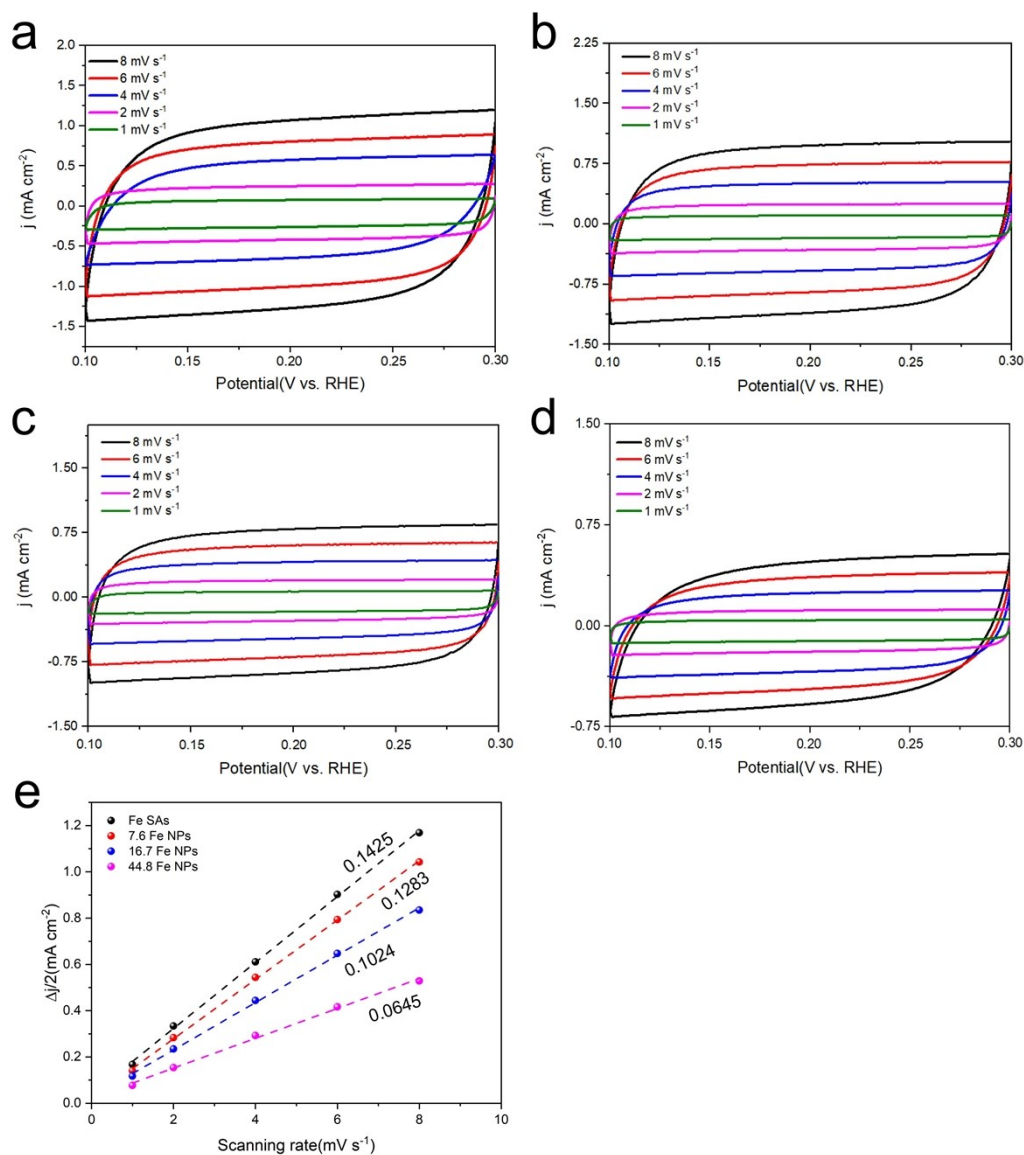

**Figure S9.** CV curves of (a) Fe SAs, (b) 7.6 Fe NPs, (c) 16.7 Fe NPs and (d) 44.8 Fe NPs. The CV measurements were performed in CO<sub>2</sub>-saturated 0.5 M KHCO<sub>3</sub> at various scan rates: 1, 2, 4, 6 and 8 mV s<sup>-1</sup>. (e) A plot of changing current density against scan rates for electrochemically active surface area (ECSA) measurements. As clearly shown, ECSA of the Fe catalysts increased in the following order of Fe SAs > 7.6 Fe NPs > 16.7 Fe NPs > 44.8 Fe NPs, coinciding with the FE<sub>CO</sub> results



**Table S1.** Elemental composition of the Ni SA sample detected by EDS

| Element | Wt%   | Atomic % |
|---------|-------|----------|
| C       | 94.70 | 95.50    |
| N       | 5.16  | 4.47     |
| Fe      | 0.14  | 0.03     |

**Table S2.** Comparison of CO<sub>2</sub> reduction performance of various catalysts

| Catalysts                     | electrolyte              | Potential<br>(V vs. RHE) | FE <sub>CO</sub><br>(%) | TOF<br>(h <sup>-1</sup> ) | Current density<br>(mA cm <sup>-2</sup> ) | Ref       |
|-------------------------------|--------------------------|--------------------------|-------------------------|---------------------------|-------------------------------------------|-----------|
| Fe SAs                        | 0.5 M KHCO <sub>3</sub>  | -0.9                     | 99.46                   | 12056                     | 39.79                                     | This work |
| 7.6 Fe NPs                    | 0.5 M KHCO <sub>3</sub>  | -0.9                     | 92.05                   | 1660                      | 21.91                                     | This work |
| 16.7 Fe NPs                   | 0.5 M KHCO <sub>3</sub>  | -0.9                     | 82.78                   | 273                       | 14.40                                     | This work |
| 44.8 Fe NPs                   | 0.5 M KHCO <sub>3</sub>  | -0.9                     | 75.58                   | 143                       | 11.34                                     | This work |
| Fe SAs                        | 0.1 M KHCO <sub>3</sub>  | -0.6                     | 80                      | /                         | 1.75                                      | 1         |
| Fe-N-C                        | 0.1 M NaHCO <sub>3</sub> | -0.6                     | 91                      | /                         | 7.5                                       | 2         |
| Ni-N-C                        | 0.1 M KHCO <sub>3</sub>  | -0.75                    | 96                      | 1060                      | 8.2                                       | 3         |
| Fe-NS-C                       | 0.5 M KHCO <sub>3</sub>  | -0.6                     | 98                      | /                         | 7.1                                       | 4         |
| Au Nanowires                  | 0.5 M KHCO <sub>3</sub>  | -0.35                    | 94                      | 72                        | 8.16                                      | 5         |
| Co-N <sub>5</sub> /<br>HNPCSs | 0.2 M NaHCO <sub>3</sub> | -0.73                    | 99.2                    | 480.2                     | ~ 4.5                                     | 6         |
| Nanoporous<br>Ag<br>Pd        | 0.5 M KHCO <sub>3</sub>  | -0.5                     | 92                      | 7.2                       | ~8.7                                      | 7         |
| Nanoparticles                 | 0.1 M KHCO <sub>3</sub>  | -0.89                    | 91                      | 576                       | ~9.76                                     | 8         |
| Cu/SnO <sub>2</sub> NP        | 0.5 M KHCO <sub>3</sub>  | -0.7                     | 93                      | /                         | 4.6                                       | 9         |
| Cu-Pd NPs                     | 0.1 M KHCO <sub>3</sub>  | -0.9                     | 87                      | /                         | 47 mA mgPd <sup>-1</sup>                  | 10        |
| ZnN <sub>x</sub> /C           | 0.5 M KHCO <sub>3</sub>  | -0.43                    | 95                      | 1416                      | 4.8                                       | 11        |
| Ag-Cu aerogel                 | 0.1 M KHCO <sub>3</sub>  | -0.89                    | 89.40                   | /                         | 5.86                                      | 12        |
| Perfluorinated<br>CoPc        | 0.5 M KHCO <sub>3</sub>  | -0.8                     | 93                      | 5760                      | ~4.4                                      | 13        |

**Table S3.** The results of operando XAS

| Sample                         | Coordination | CN  | R(Å) | $\sigma^2(\times 10^{-3}\text{Å}^2)$ | $\Delta E(\text{eV})$ | R-factor |
|--------------------------------|--------------|-----|------|--------------------------------------|-----------------------|----------|
| Fe foil                        | Fe-Fe        | 8   | 2.46 | /                                    | /                     | /        |
|                                | Fe-Fe        | 6   | 2.86 | /                                    | /                     | /        |
| Fe <sub>2</sub> O <sub>3</sub> | Fe-O         | 3   | 1.95 | /                                    | /                     | /        |
|                                | Fe-O         | 3   | 2.12 | /                                    | /                     | /        |
| Dry                            | Fe-Fe        | 3.8 | 2.83 | 9.0                                  | 2.1                   |          |
|                                | Fe-N         | 5.3 | 1.99 | 3.0                                  | 2.8                   | 0.45%    |
|                                | Fe-C         | 3.1 | 2.99 | 13.0                                 | 5.0                   |          |
| -0.3V                          | Fe-N         | 5.4 | 2.01 | 3.0                                  | 2.4                   | 0.22%    |
|                                | Fe-C         | 1.4 | 3.03 | 10.0                                 | 5.0                   |          |
| -0.8V                          | Fe-N         | 5.0 | 2.04 | 14.3                                 | 1.3                   | 2.00%    |
|                                | Fe-C         | 4.0 | 3.20 | 9.0                                  | 6.5                   |          |
| -0.9V                          | Fe-N         | 2.4 | 1.93 | 3.0                                  | -6.3                  | 1.95%    |
|                                | Fe-Fe        | 2.8 | 2.70 | 4.0                                  | -1.9                  |          |

## Reference

- (1) Zhang, C.; Yang, S.; Wu, J.; Liu, M.; Yazdi, S.; Ren, M.; Sha, J.; Zhong, J.; Nie, K.; Jalilov, A. S.; Li, Z.; Li, H.; Yakobson, B. I.; Wu, Q.; Ringe, E.; Xu, H.; Ajayan, P. M.; Tour, J. M. Electrochemical CO<sub>2</sub> Reduction with Atomic Iron-Dispersed on Nitrogen-Doped Graphene. *Advanced Energy Materials* **2018**, *8*.
- (2) Huan, T. N.; Ranjbar, N.; Rousse, G.; Sougrati, M.; Zitolo, A.; Mougél, V.; Jaouen, F.; Fontecave, M. Electrochemical Reduction of CO<sub>2</sub> Catalyzed by Fe-N-C Materials: A Structure–Selectivity Study. *ACS Catalysis* **2017**, *7*, 1520-1525.
- (3) Pan, F.; Deng, W.; Justiniano, C.; Li, Y. Identification of champion transition metals centers in metal and nitrogen-codoped carbon catalysts for CO<sub>2</sub> reduction. *Applied Catalysis B: Environmental* **2018**, *226*, 463-472.
- (4) Pan, F.; Li, B.; Sarnello, E.; Hwang, S.; Gang, Y.; Feng, X.; Xiang, X.; Adli, N. M.; Li, T.; Su, D.; Wu, G.; Wang, G.; Li, Y. Boosting CO<sub>2</sub> reduction on Fe-N-C with sulfur incorporation: Synergistic electronic and structural engineering. *Nano Energy* **2020**, *68*.
- (5) Zhu, W.; Zhang, Y. J.; Zhang, H.; Lv, H.; Li, Q.; Michalsky, R.; Peterson, A. A.; Sun, S. Active and selective conversion of CO<sub>2</sub> to CO on ultrathin Au nanowires. *J Am Chem Soc* **2014**, *136*, 16132-16135.
- (6) Pan, Y.; Lin, R.; Chen, Y.; Liu, S.; Zhu, W.; Cao, X.; Chen, W.; Wu, K.; Cheong, W. C.; Wang, Y.; Zheng, L.; Luo, J.; Lin, Y.; Liu, Y.; Liu, C.; Li, J.; Lu, Q.; Chen, X.; Wang, D.; Peng, Q.; Chen, C.; Li, Y. Design of Single-Atom Co-N<sub>5</sub> Catalytic Site: A Robust Electrocatalyst for CO<sub>2</sub> Reduction with Nearly 100% CO Selectivity and Remarkable Stability. *J Am Chem Soc* **2018**, *140*, 4218-4221.
- (7) Lu, Q.; Rosen, J.; Zhou, Y.; Hutchings, G. S.; Kimmel, Y. C.; Chen, J. G.; Jiao, F. A selective and efficient electrocatalyst for carbon dioxide reduction. *Nat Commun* **2014**, *5*, 3242.
- (8) Gao, D.; Zhou, H.; Wang, J.; Miao, S.; Yang, F.; Wang, G.; Wang, J.; Bao, X. Size-dependent electrocatalytic reduction of CO<sub>2</sub> over Pd nanoparticles. *J Am Chem Soc* **2015**, *137*, 4288-4291.
- (9) Li, Q.; Fu, J.; Zhu, W.; Chen, Z.; Shen, B.; Wu, L.; Xi, Z.; Wang, T.; Lu, G.; Zhu, J. J.; Sun, S. Tuning Sn-Catalysis for Electrochemical Reduction of CO<sub>2</sub> to CO via the Core/Shell Cu/SnO<sub>2</sub> Structure. *J Am Chem Soc* **2017**, *139*, 4290-4293.
- (10) Mun, Y.; Lee, S.; Cho, A.; Kim, S.; Han, J. W.; Lee, J. Cu-Pd alloy nanoparticles as highly selective catalysts for efficient electrochemical reduction of CO<sub>2</sub> to CO. *Applied Catalysis B: Environmental* **2019**, *246*, 82-88.
- (11) Yang, F.; Song, P.; Liu, X.; Mei, B.; Xing, W.; Jiang, Z.; Gu, L.; Xu, W. Highly Efficient CO<sub>2</sub> Electroreduction on ZnN<sub>4</sub>-based Single-Atom Catalyst. *Angew Chem Int Ed Engl* **2018**, *57*, 12303-12307.
- (12) Wang, W.; Gong, S.; Liu, J.; Ge, Y.; Wang, J.; Lv, X. Ag-Cu aerogel for electrochemical CO<sub>2</sub> conversion to CO. *J Colloid Interface Sci* **2021**, *595*, 159-167.
- (13) Morlanés, N.; Takanabe, K.; Rodionov, V. Simultaneous Reduction of CO<sub>2</sub> and Splitting of H<sub>2</sub>O by a Single Immobilized Cobalt Phthalocyanine Electrocatalyst. *ACS Catalysis* **2016**, *6*, 3092-3095.
